# Supplementary figures and images for: An easy to assemble PDMS/CNTs/PANI flexible supercapacitor with high energy-to-power density
Source: Royal Society of Chemistry journal article supplement (doi:10.1039/d1nr06914d), 2022-01-01

### PDMS

### ACNTA/PDMS

### ACNTA-PANI/PDMS

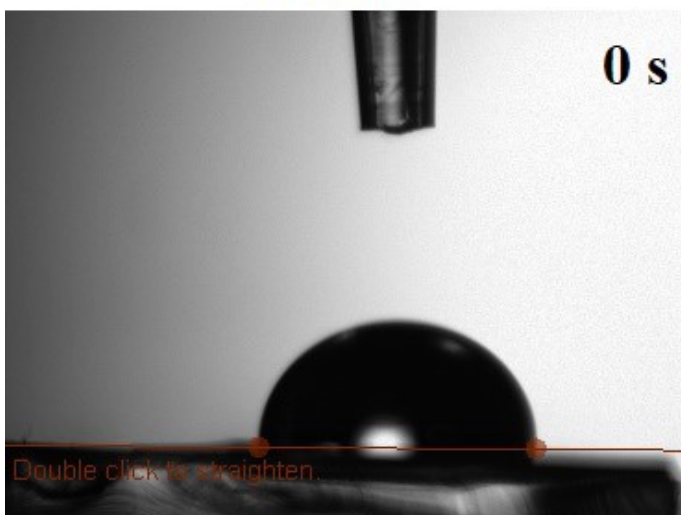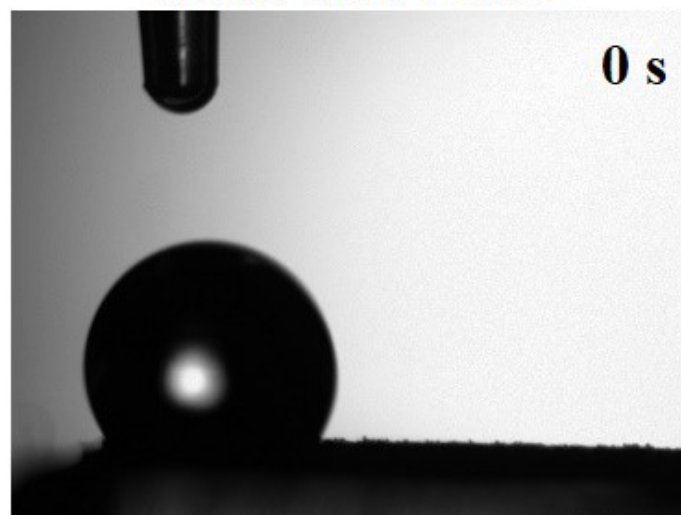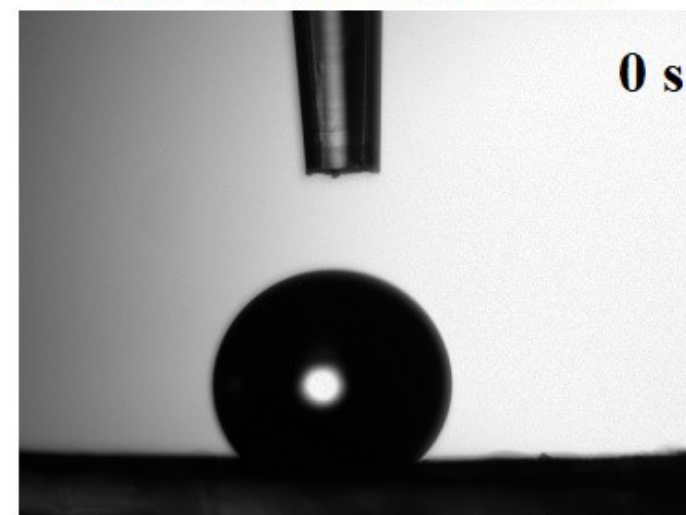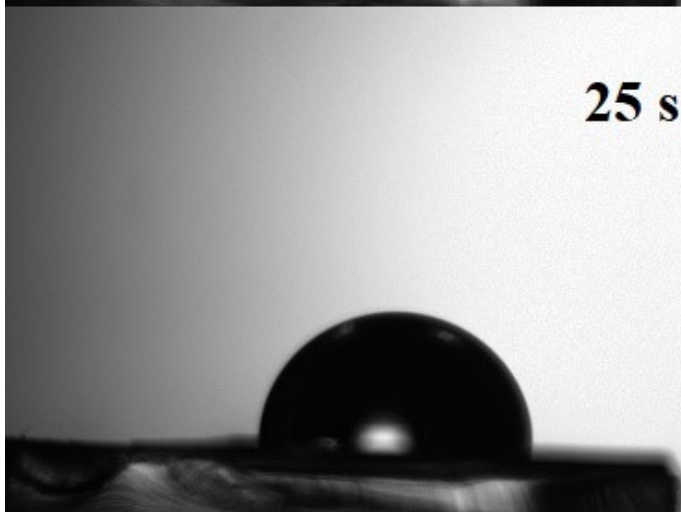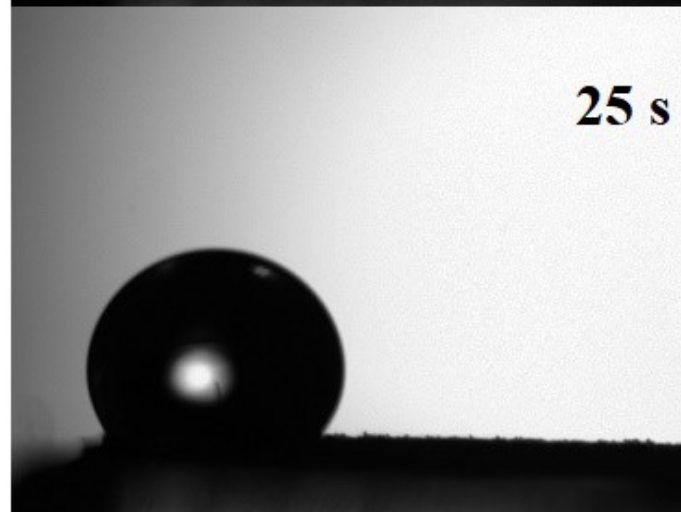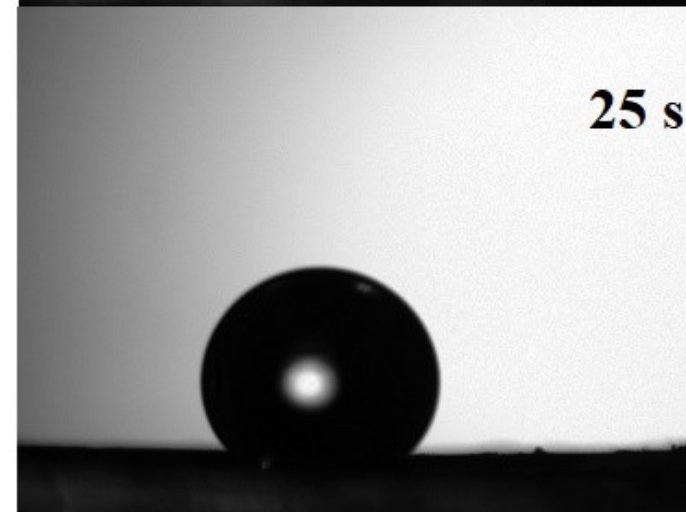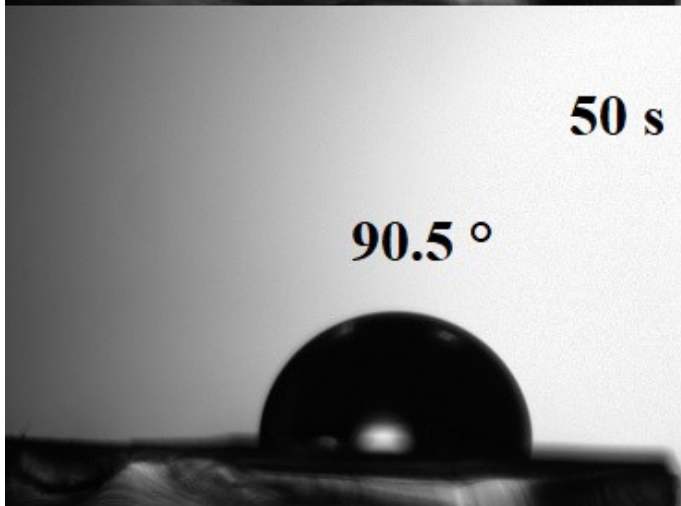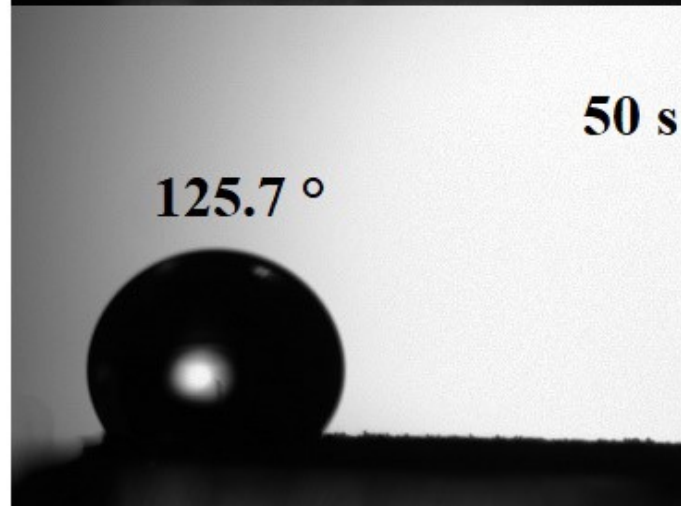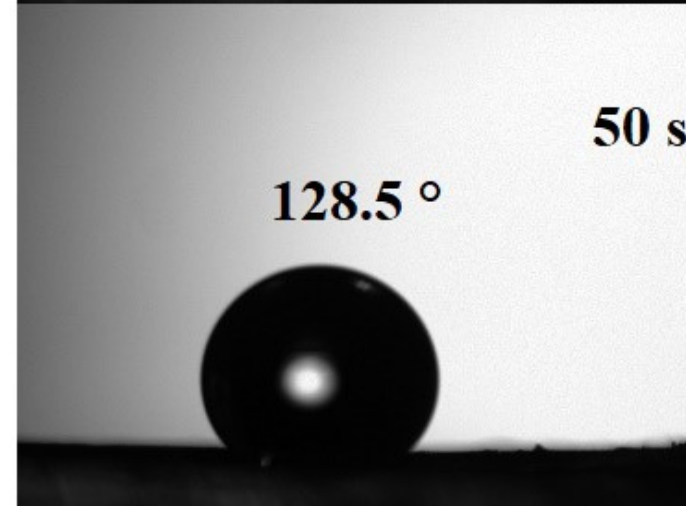

Supplement: d1nr06914d2.pdf [file d1nr06914d2.pdf]

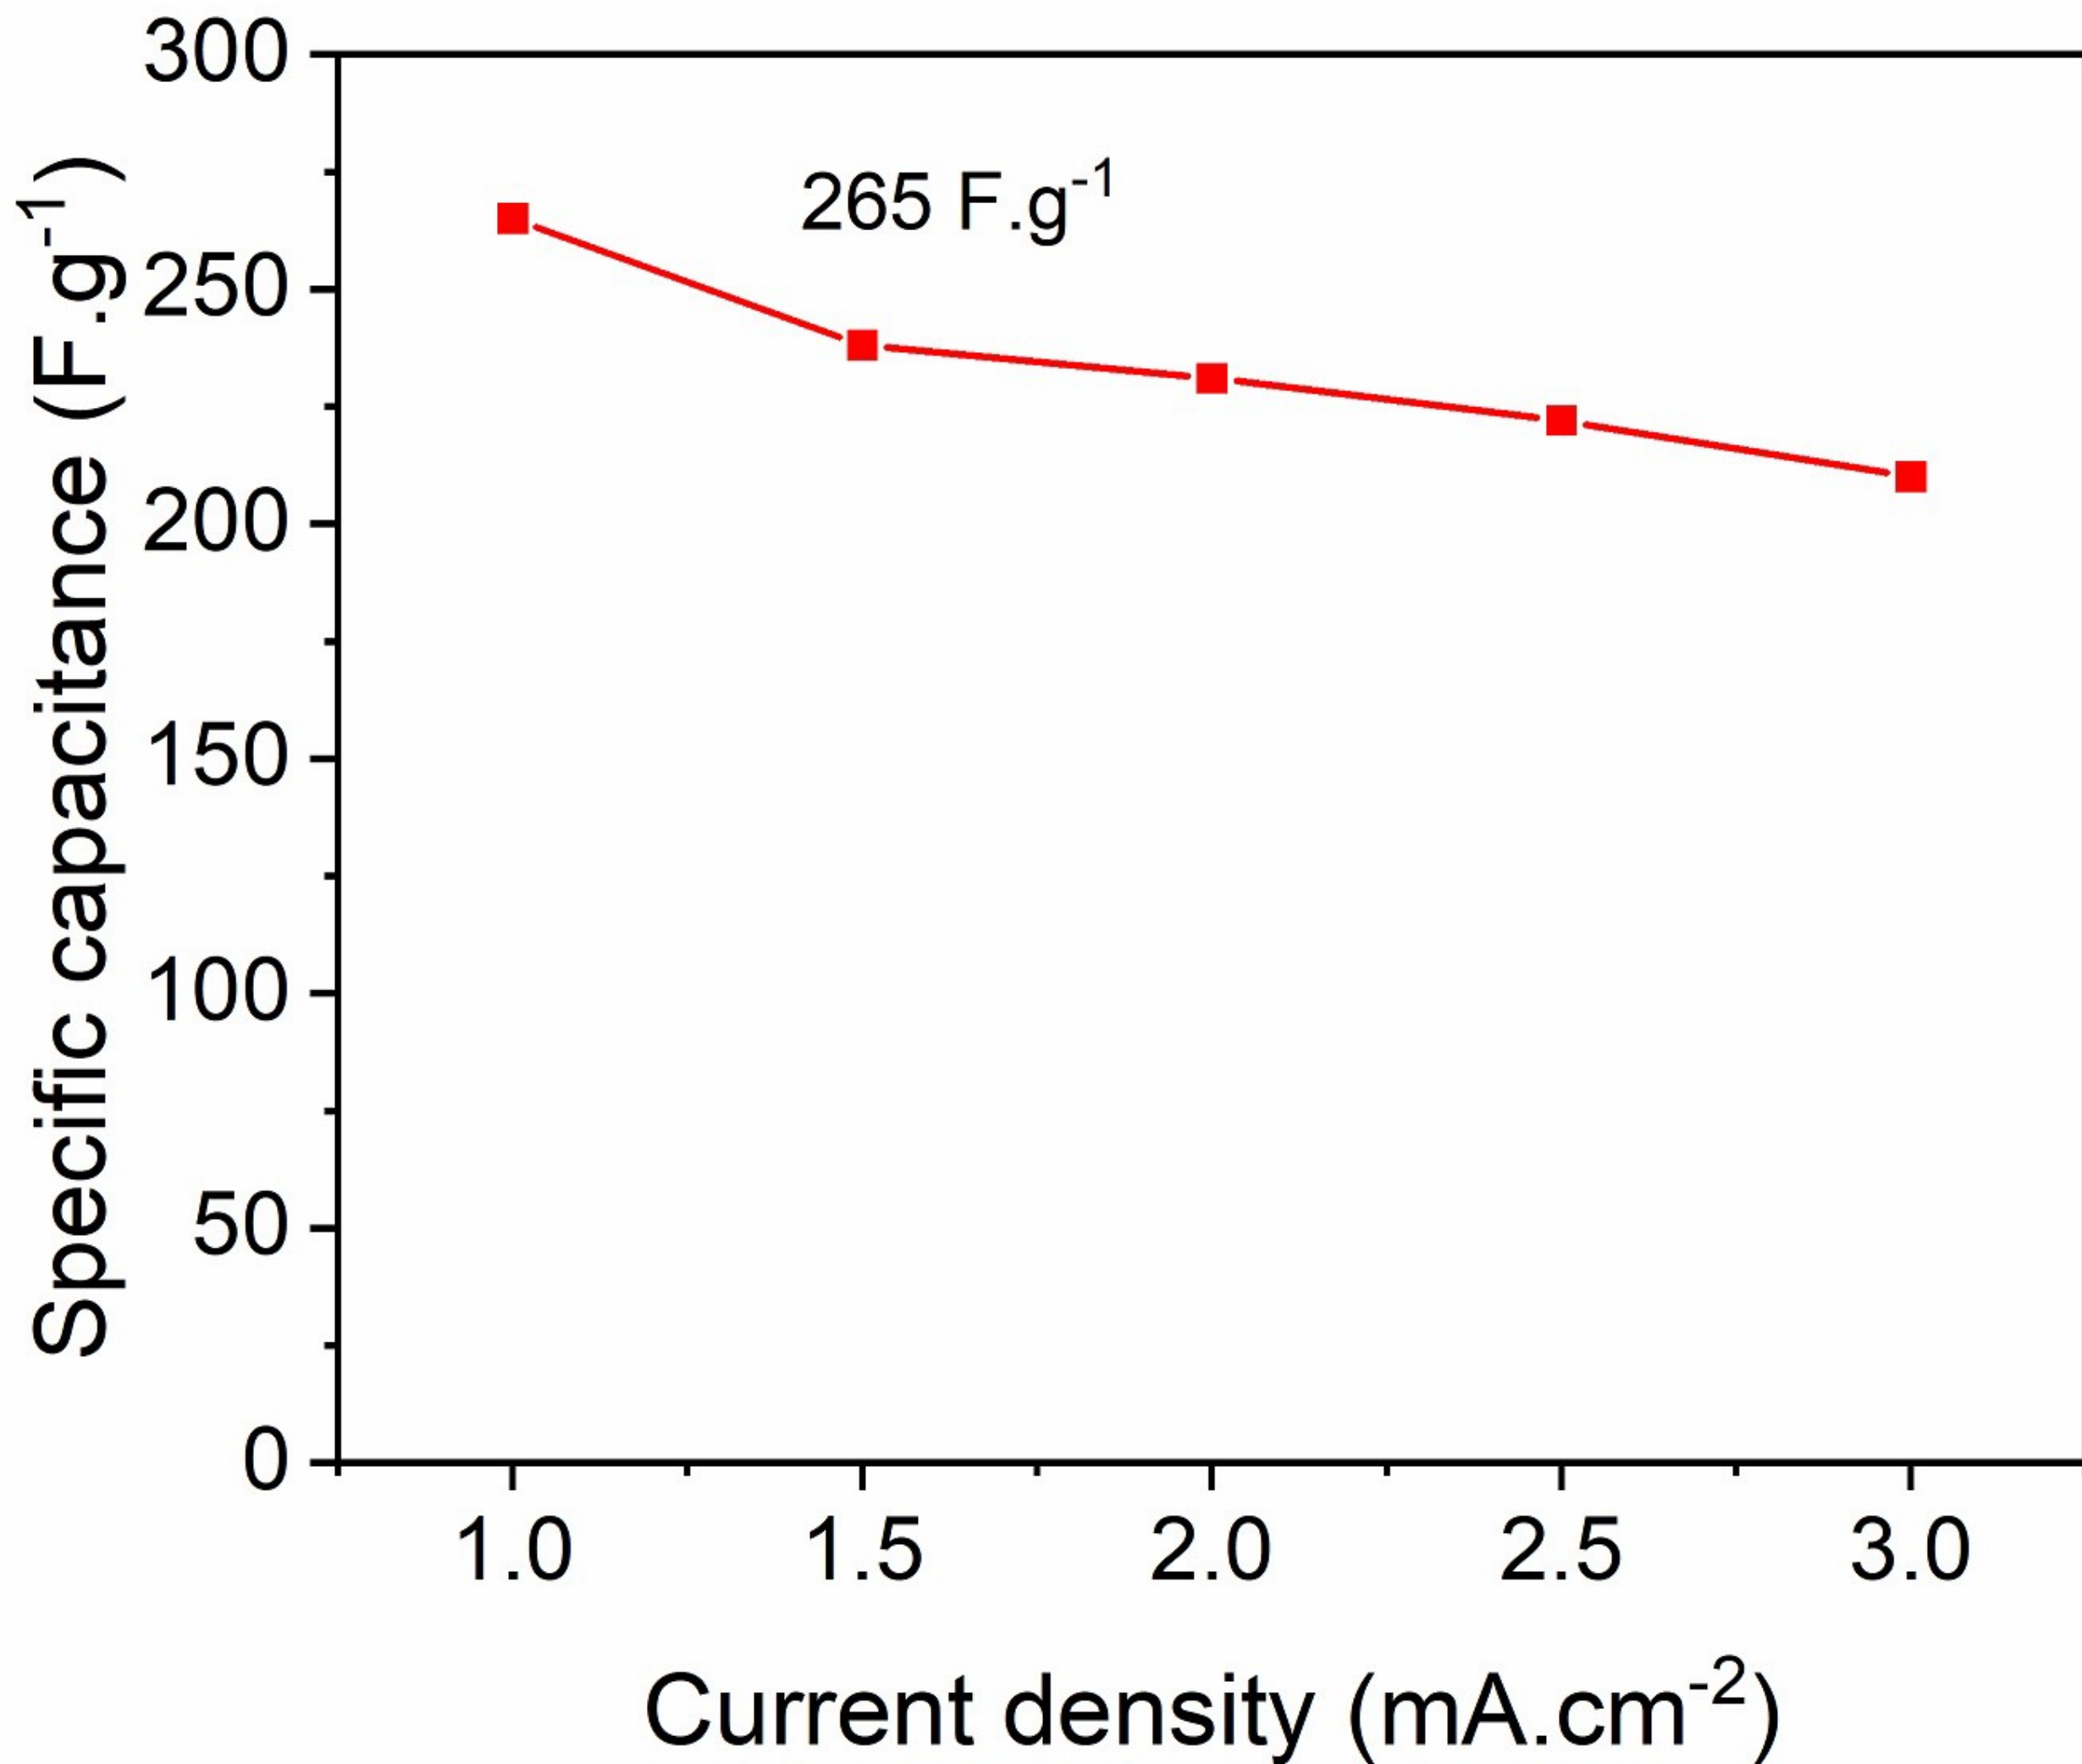

Supplement: d1nr06914d3.pdf [file d1nr06914d3.pdf]

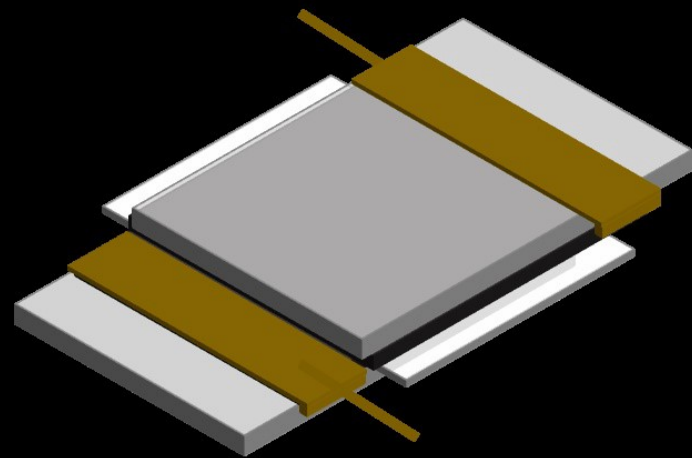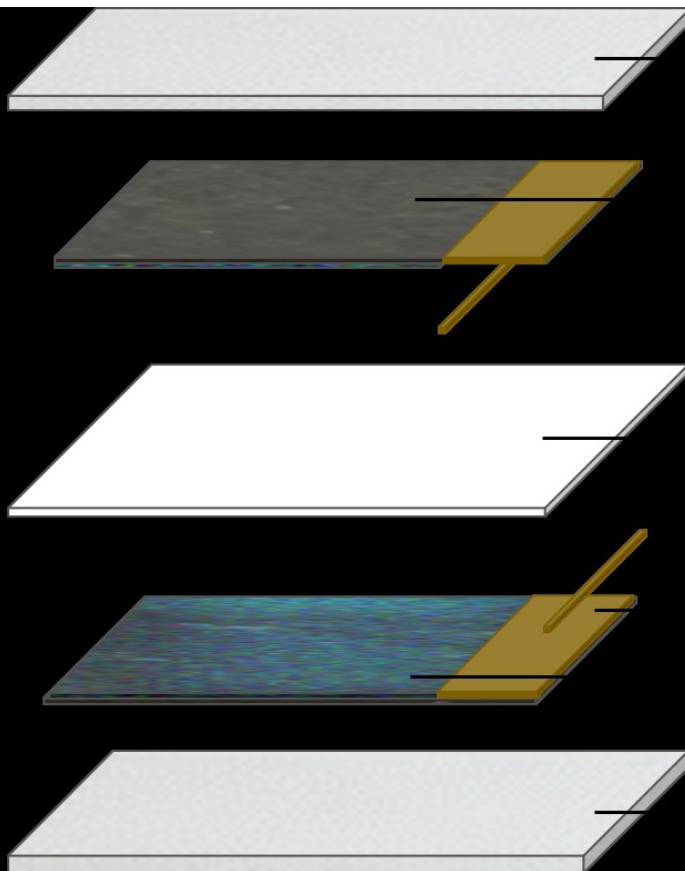

Supplement: d1nr06914d7.pdf [file d1nr06914d7.pdf]
